# Supplementary material for: Coherent control of electron-ion entanglement in multiphoton ionization
Source: Research Square preprint supplement (doi:10.21203/rs.3.rs-6543988/v1), 2025-08-27
Supplement: Supplementary file 1 [file 3b0a7cb5f65551cf700fb3fb.pdf]

# **Supplementary Information for**

## **Coherent control of electron-ion entanglement in multiphoton ionization**

Yi-Jia Mao<sup>1,2†</sup>, Zhao-Han Zhang<sup>2†</sup>, Yang Li<sup>2\*</sup>, Takeshi Sato<sup>3,4,5</sup>, Kenichi L. Ishikawa<sup>3,4,5,6</sup>,  
Feng He<sup>1,2\*</sup>

<sup>1</sup>Tsung-Dao Lee Institute, Shanghai Jiao Tong University, Shanghai 201210, China.

<sup>2</sup>Key Laboratory for Laser Plasmas (Ministry of Education) and School of Physics and Astronomy,  
Collaborative Innovation Center for IFSA (CICIFSA),  
Shanghai Jiao Tong University, Shanghai 200240, China.

<sup>3</sup>Department of Nuclear Engineering and Management, Graduate School of Engineering,  
The University of Tokyo, 7-3-1 Hongo, Bunkyo-ku, Tokyo 113-8656, Japan.

<sup>4</sup>Photon Science Center, Graduate School of Engineering, The University of Tokyo,  
7-3-1 Hongo, Bunkyo-ku, Tokyo 113-8656, Japan.

<sup>5</sup>Research Institute for Photon Science and Laser Technology, The University of Tokyo,  
7-3-1 Hongo, Bunkyo-ku, Tokyo 113-0033, Japan.

<sup>6</sup>Institute for Attosecond Laser Facility, The University of Tokyo,  
7-3-1 Hongo, Bunkyo-ku, Tokyo 113-0033, Japan.

\*Corresponding author. Email: liyang22@sjtu.edu.cn; fhe@sjtu.edu.cn

†These authors contributed equally to this work.

# 1 Derivation of the photoelectron purity

The total wave function of the combined ion and photoelectron system can be decomposed under the decoupled representation as

$$|\Psi\rangle = \sum_{m_i, m_e} C_{m_i, m_e} |m_i\rangle |m_e\rangle. \quad (\text{S1})$$

$C_{m_i, m_e}$  denotes the amplitude of each decoupled state, where the contributions from different  $l_e$  but the same  $m_e$  are already summed up. Although both the ionization from the  $3s$  and  $3p$  orbitals are considered, for the ionization signal near  $\varepsilon = 2\omega_1 + \omega_2 - I_p$ , the contributions primarily originate from the  $3p$  shells. Therefore, the angular quantum number of the ion,  $l_i$ , can always be considered as 1, which can be omitted in the decomposition of the total wave function.

Under linearly polarized fields, the conservation of the total magnetic quantum number ( $m_i + m_e = 0$ ) further simplifies the decomposition to

$$|\Psi\rangle = \sum_{m_i} C_{m_i} |m_i\rangle |-m_i\rangle. \quad (\text{S2})$$

The density matrix of the system is calculated as

$$\begin{aligned} \rho &= |\Psi\rangle\langle\Psi| \\ &= \sum_{m_i, m'_i} C_{m_i} C_{m'_i}^* |m_i\rangle |-m_i\rangle \langle -m'_i| \langle m'_i|. \end{aligned} \quad (\text{S3})$$

By taking the partial trace with respect to the ionic state, the density matrix of the photoelectron can be obtained as

$$\begin{aligned} \rho_e = \text{Tr}_i[\rho] &= \sum_{m''_i} \sum_{m_i, m'_i} C_{m_i} C_{m'_i}^* \langle m''_i | m_i \rangle |-m_i\rangle \langle -m'_i| \langle m'_i | m''_i \rangle \\ &= \sum_{m''_i} \sum_{m_i, m'_i} C_{m_i} C_{m'_i}^* \delta_{m''_i, m_i} \delta_{m'_i, m''_i} |-m_i\rangle \langle -m'_i| \\ &= \sum_{m''_i} |C_{m''_i}|^2 |-m''_i\rangle \langle -m''_i| \\ &= \sum_{m_e} |C_{m_e}|^2 |m_e\rangle \langle m_e|. \end{aligned} \quad (\text{S4})$$

It is clearly observed that the electronic subsystem is in mixed states. For the ionization of argon atoms induced by linearly polarized fields,  $m_e = 0, \pm 1$ . At the scattering energy range of interest,

up to the  $d$  wave dominates the photoelectron energy spectrum. As mentioned before, the probabilities,  $|C_{m_e}|^2$  contain the contributions with the same  $m_e$  but different angular quantum numbers. Therefore, the probabilities can be estimated by the partial-wave probabilities as

$$|C_0|^2 = \frac{M_{s_0} + M_{d_0}}{M_{s_0} + M_{d_0} + 2M_{d_1}}, \quad (\text{S5})$$

$$|C_{+1}|^2 = |C_{-1}|^2 = \frac{M_{d_1}}{M_{s_0} + M_{d_0} + 2M_{d_1}}. \quad (\text{S6})$$

These probabilities are normalized to ensure that  $\text{Tr}[\rho_e] = 1$ . The factor of 2 in  $M_{d_1}$  accounts for the equivalent contributions for the  $d_1$  and  $d_{-1}$  waves. Then, the purity of the scattering electron is

$$P_e = \text{Tr}[\rho_e^2] = \frac{(M_{s_0} + M_{d_0})^2 + 2M_{d_1}^2}{(M_{s_0} + M_{d_0} + 2M_{d_1})^2}. \quad (\text{S7})$$

## 2 Derivation of anisotropy parameters

For the  $(2 + 1')$  REMPI via the  $p$  resonant states in argon atoms, the  $m_e = 0$  electron can be ejected to  $s_0$  and  $d_0$  waves. Assume the corresponding complex amplitudes are denoted as  $C_{s_0}$  and  $C_{d_0}$ , then the PAD for the  $m_e = 0$  electron can be expressed as

$$\begin{aligned} I_0(\theta) &= |C_{s_0}Y_{00}(\theta) + C_{d_0}Y_{20}(\theta)|^2 \\ &= \frac{1}{4\pi}M_{s_0} + \frac{\sqrt{5}}{2\pi}\text{Re}[C_{s_0}^*C_{d_0}]P_2(\cos\theta) + \frac{5}{4\pi}\left[\frac{18}{35}P_4(\cos\theta) + \frac{2}{7}P_2(\cos\theta) + \frac{1}{5}\right]M_{d_0}, \end{aligned} \quad (\text{S8})$$

with  $Y_{l0}(\theta) = \sqrt{\frac{2l+1}{4\pi}}P_l(\cos\theta)$ ,  $M_{s_0} = |C_{s_0}|^2$ , and  $M_{d_0} = |C_{d_0}|^2$ . Similarly, since the  $m_e = \pm 1$  electron can only be ejected to  $d_{\pm 1}$  waves, the PAD for the  $m_e = \pm 1$  orbitals can be obtained as

$$I_{\pm 1}(\theta) = |C_{d_{\pm 1}}Y_{2\pm 1}(\theta, \phi)|^2 = \frac{1}{\pi}\left[-\frac{3}{7}P_4(\cos\theta) + \frac{5}{28}P_2(\cos\theta) + \frac{1}{4}\right]M_{d_{\pm 1}}, \quad (\text{S9})$$

where  $C_{d_{\pm 1}}$  are the complex amplitudes of the  $d_{\pm 1}$  waves and  $M_{d_{\pm 1}} = |C_{d_{\pm 1}}|^2$ . Since the contributions from the  $m = \pm 1$  orbitals are the same, the total PAD can be calculated as  $I(\theta) = I_0(\theta) + 2I_1(\theta)$ . By projecting the PAD onto the Legendre polynomials based on  $I(\theta) = \sum_{n=0,2,4} b_n P_n(\cos\theta)$ , we can obtain

$$b_0 = \frac{1}{4\pi}(M_{s_0} + M_{d_0} + 2M_{d_1}), \quad (\text{S10a})$$

$$b_2 = \frac{5}{14\pi}(M_{d_0} + M_{d_1}) + \frac{\sqrt{5}}{2\pi}\text{Re}[C_{s_0}^*C_{d_0}], \quad (\text{S10b})$$

$$b_4 = \frac{3}{14\pi}(3M_{d_0} - 4M_{d_1}). \quad (\text{S10c})$$

To build a quantitative connection between the quantum beat between the resonant states and the anisotropy parameters, we first calculate the partial-wave probabilities with the amplitudes of different coupled states,  $C_{\psi_j}$  (See main text). In the calculation, the phases of the complex amplitudes of different multi-electron states need to be written explicitly to show a clear dependence on the pulse delay. According to the definition of the phases regarding different states  $|\psi_i\rangle$  in the main text, the partial-wave probabilities can be calculated as

$$M_{s_0}(\tau) = |C_{\psi_3}|^2 = |C_{\psi_3}|^2 [1 + 2\alpha_3^D \alpha_3^S \cos(\Delta E \tau + \chi_{DS})], \quad (\text{S11a})$$

$$\begin{aligned} M_{d_0}(\tau) &= \left| \sqrt{\frac{3}{5}} C_{\psi_1} - \sqrt{\frac{2}{5}} C_{\psi_2} \right|^2 \\ &= \left[ \frac{3}{5} |C_{\psi_1}|^2 + \frac{2}{5} |C_{\psi_2}|^2 - \frac{2\sqrt{6}}{5} |C_{\psi_1}| |C_{\psi_2}| \alpha_2^D \cos(\eta_{12}) \right] + \frac{4}{5} |C_{\psi_2}|^2 \alpha_2^D \alpha_2^S \cos(\Delta E \tau + \chi_{DS}) \\ &\quad - \frac{2\sqrt{6}}{5} |C_{\psi_1}| |C_{\psi_2}| \alpha_2^S \cos(\Delta E \tau + \eta_{12} + \chi_{DS}), \end{aligned} \quad (\text{S11b})$$

$$\begin{aligned} M_{d_1}(\tau) &= \left| \sqrt{\frac{1}{5}} C_{\psi_1} + \sqrt{\frac{3}{10}} C_{\psi_2} \right|^2 \\ &= \left[ \frac{1}{5} |C_{\psi_1}|^2 + \frac{3}{10} |C_{\psi_2}|^2 + \frac{\sqrt{6}}{5} |C_{\psi_1}| |C_{\psi_2}| \alpha_2^D \cos(\eta_{12}) \right] + \frac{3}{5} |C_{\psi_2}|^2 \alpha_2^D \alpha_2^S \cos(\Delta E \tau + \chi_{DS}) \\ &\quad + \frac{\sqrt{6}}{5} |C_{\psi_1}| |C_{\psi_2}| \alpha_2^S \cos(\Delta E \tau + \eta_{12} + \chi_{DS}). \end{aligned} \quad (\text{S11c})$$

Therefore, the anisotropy parameters can be calculated as

$$b_0(\tau) = \frac{1}{4\pi} \left[ |C_{\psi_1}|^2 + |C_{\psi_2}|^2 + |C_{\psi_3}|^2 + 2(|C_{\psi_3}|^2 \alpha_3^D \alpha_3^S + |C_{\psi_2}|^2 \alpha_2^D \alpha_2^S) \cos(\Delta E \tau + \chi_{DS}) \right], \quad (\text{S12a})$$

$$\begin{aligned} b_2(\tau) &= \frac{1}{\pi} \left[ \frac{2}{7} |C_{\psi_1}|^2 + \frac{1}{4} |C_{\psi_2}|^2 - \frac{\sqrt{6}}{14} |C_{\psi_1}| |C_{\psi_2}| \alpha_2^D \cos(\eta_{12}) - \frac{\sqrt{3}}{2} |C_{\psi_1}| |C_{\psi_3}| \alpha_3^D \cos(\eta_{13}) \right. \\ &\quad + \frac{\sqrt{2}}{2} |C_{\psi_2}| |C_{\psi_3}| \alpha_2^D \alpha_3^D \cos(\eta_{23}) + \frac{\sqrt{2}}{2} |C_{\psi_2}| |C_{\psi_3}| \alpha_2^S \alpha_3^S \cos(\eta_{23}) \\ &\quad - \frac{\sqrt{6}}{14} |C_{\psi_1}| |C_{\psi_2}| \alpha_2^S \cos(\Delta E \tau + \eta_{12} + \chi_{DS}) + \frac{1}{2} |C_{\psi_2}|^2 \alpha_2^D \alpha_2^S \cos(\Delta E \tau + \chi_{DS}) \\ &\quad - \frac{\sqrt{3}}{2} |C_{\psi_1}| |C_{\psi_3}| \alpha_3^S \cos(\Delta E \tau + \chi_{DS} + \eta_{13}) + \frac{\sqrt{2}}{2} |C_{\psi_2}| |C_{\psi_3}| \alpha_2^S \alpha_3^D \cos(\Delta E \tau + \chi_{DS} - \eta_{23}) \\ &\quad \left. + \frac{\sqrt{2}}{2} |C_{\psi_2}| |C_{\psi_3}| \alpha_2^D \alpha_3^S \cos(\Delta E \tau + \chi_{DS} + \eta_{23}) \right], \end{aligned} \quad (\text{S12b})$$

$$b_4(\tau) = \frac{3}{14\pi} \left[ |C_{\psi_1}|^2 - 2\sqrt{6} |C_{\psi_1}| |C_{\psi_2}| \alpha_2^D \cos(\eta_{12}) - 2\sqrt{6} |C_{\psi_1}| |C_{\psi_2}| \alpha_2^S \cos(\Delta E \tau + \chi_{DS} + \eta_{12}) \right]. \quad (\text{S12c})$$

**Table S1: The fitting results of the anisotropy parameters or the combinations of different partial waves.** The fittings are all conducted with the function  $f(\tau) = G \cos(\Delta E \tau + \gamma) + H$ . The coefficients obtained are also connected with the amplitudes or the phases in the equations above.

| Targets                        | values | $G$                                                                          | values | $\gamma$                |
|--------------------------------|--------|------------------------------------------------------------------------------|--------|-------------------------|
|                                |        | correspondence                                                               |        | correspondence          |
| $-14\pi b_4/3$                 | 1.053  | $2\sqrt{6} C_{\psi_1}  C_{\psi_2} \alpha_2^S$                                | -2.145 | $\eta_{12} + \chi_{DS}$ |
| $4M_{d_1} - 3M_{d_0}$          | 1.066  | $2\sqrt{6} C_{\psi_1}  C_{\psi_2} \alpha_2^S$                                | -2.115 | $\eta_{12} + \chi_{DS}$ |
| $4\pi b_0$                     | 0.141  | $2( C_{\psi_3} ^2\alpha_3^D\alpha_3^S +  C_{\psi_2} ^2\alpha_2^D\alpha_2^S)$ | -0.026 | $\chi_{DS}$             |
| $2M_{d_1} + M_{d_0} + M_{s_0}$ | 0.141  | $2( C_{\psi_3} ^2\alpha_3^D\alpha_3^S +  C_{\psi_2} ^2\alpha_2^D\alpha_2^S)$ | -0.026 | $\chi_{DS}$             |
| $2M_{d_1} + M_{d_0}$           | 0.075  | $2 C_{\psi_2} ^2\alpha_2^D\alpha_2^S$                                        | 0.010  | $\chi_{DS}$             |
| $M_{s_0}$                      | 0.066  | $2 C_{\psi_3} ^2\alpha_3^D\alpha_3^S$                                        | -0.066 | $\chi_{DS}$             |

By fitting  $b_0(\tau)$  and  $b_4(\tau)$  with respect to  $\tau$ , the phases  $\chi_{DS}$  and  $\chi_{DS} + \eta_{12}$  can be extracted, respectively. In addition, it should be noted that the fitting of  $M_{d_0} + 2M_{d_1} = \frac{1}{4\pi}[|C_{\psi_1}|^2 + |C_{\psi_2}|^2 + 2|C_{\psi_2}|^2\alpha_2^D\alpha_2^S \cos(\Delta E \tau + \chi_{DS})]$  can also directly obtain  $\chi_{DS}$ . The fitting results of the anisotropy parameters and the partial-wave probabilities are listed in Table S1. By taking the ratio between  $|C_{\psi_1}||C_{\psi_2}|\alpha_2^S$  and  $|C_{\psi_2}|^2\alpha_2^D\alpha_2^S$ , we can find that  $|C_{\psi_1}|/|C_{\psi_2}|\alpha_2^D = 5.79$ . This illustrates the complete dominance of the transition from  $^1D^e$  to  $^1F^o$  over  $^1D^e$  to  $^1P^o$ , which is an extension of Fano's propensity from the single-electron state to the multi-electron state.

### 3 Choice of the first pulse

To determine the frequency of the first pulse,  $\omega_1$ , pulses with frequencies ranging from 6.31 eV to 6.69 eV are applied to induce the three-photon ionization in argon atoms. This range covers the photon energies that can induce the two-photon transition to the resonant states  $^1D^e$  and  $^1S^e$ . Fig. S1 shows the intensities of the photoelectron signal integrated over the ionization peak in the vicinity of  $\varepsilon = 3\omega_1 - I_p$  with different applied laser frequencies. The contributions from different photoelectron partial waves or the multi-electron states are displayed, respectively, in (a) and (b).

The two peaks shown in the total signal, which are also the peaks of the states  $|\psi_2\rangle$  and  $|\psi_3\rangle$

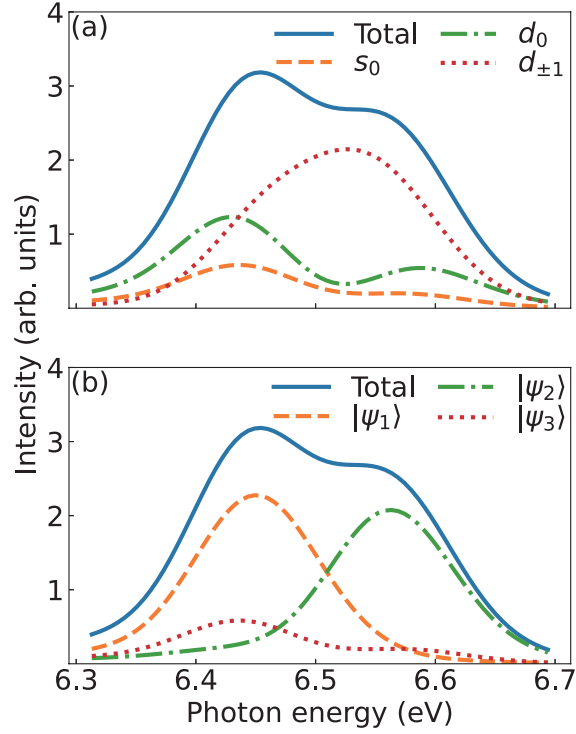

**Fig. S1: Three-photon ionization signal induced by the first pulse with different frequencies.**

**a** Intensities of the photoelectron signal integrated over the ionization peak in the vicinity of  $\varepsilon = 3\omega_1 - I_p$  with different applied pulse frequencies  $\omega_1$ . The contributions for different partial waves are also provided. **b** Same as **a** but with contributions from different coupled channels.

in Fig. S1, correspond to the ionization pathways via the two resonant  $4p$  states. We can speculate from the photoelectron energy spectrum (PES) that the energy difference between the two states is around 0.218 eV. The pump pulse in the main text is chosen as 6.52 eV for two reasons. Firstly, the contributions from  $|\psi_1\rangle$  and  $|\psi_2\rangle$  states are almost equivalent at this time, indicating a near-equal proportion of the ionization from the two resonant states. Due to the selection rule,  $|\psi_1\rangle$  can only be transmitted from the  $^1D^e$  state, while due to Fano's propensity rule,  $|\psi_2\rangle$  is more likely to be ionized from the  $^1S^e$  state. Secondly, at this frequency, the contribution of the  $d_0$  wave is much lower than the  $d_{\pm 1}$  waves, which makes the change of the PADs in the sequential two-stage scheme more significant.

## 4 Comparison between RMT and MCTDHF results

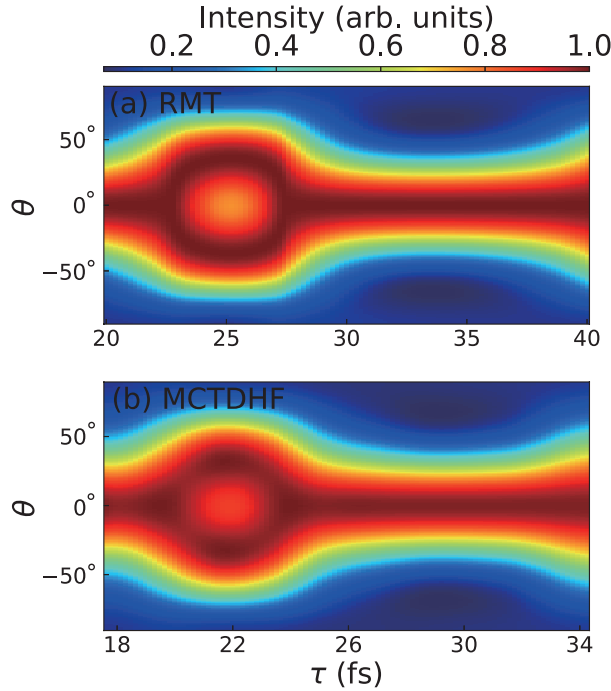

**Fig. S2: Comparison between the PADs calculated by the RMT method and the MCTDHF method. a** Delay-dependent PADs calculated by the RMT method. **b** Same as **a** but calculated by the MCTDHF method.

Figure S2 displays the comparison between the delay-dependent PADs calculated by the RMT method and those by the MCTDHF method. The behavior of the PADs as a function of the pulse

from the two methods highly agrees with each other. A slight difference occurs in the oscillation periods and phases given by the two methods. Since the two methods apply different models, their estimations of the energies of the excited states and the scattering phases induced by the short-range potential are different, which leads to the difference in the PADs.

## 5 Energy-resolved partial wave analysis

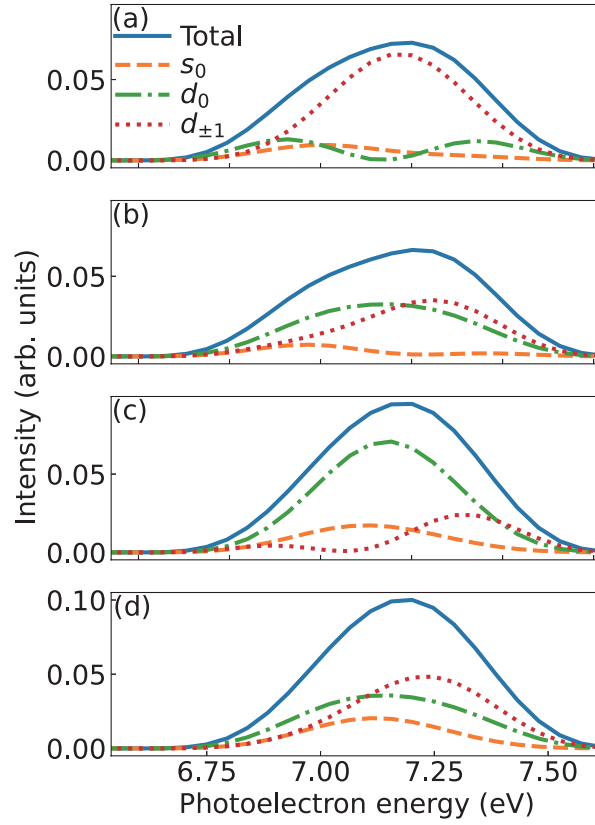

**Fig. S3: Photoelectron energy for different pulse delays.** **a** Photoelectron energy spectrum for  $\tau = 24.75$  fs. The contributions from different partial waves are separated. **b**, **c**, and **d** Same as **a** but for  $\tau = 29.5$ ,  $34.25$ , and  $39$  fs.

In the PES of the  $(2 + 1')$  REMPI, the peaks from different partial waves do not share the same center. Instead, their locations are sensitive to the pulse delay. Fig. S3 shows the ionization signal near  $\varepsilon = 2\omega_1 + \omega_2 - I_p$ . (a), (b), (c), and (d) show the total PES as well as the individual contributions from  $s_0$ ,  $d_0$ , and  $d_{\pm 1}$  waves for pulse delays of  $24.75$ ,  $29.5$ ,  $34.25$ , and  $39$  fs, respectively. It is



discovered that  $d_{\pm 1}$  waves dominate the peak for  $\tau = 24.75$  fs, whereas the situation reverses at the edges of the peak. This brings about three local maxima of purity in the energy domain. The case is similar for  $\tau = 34.25$  fs, but the status of  $d_{\pm 1}$  and  $d_0$  waves exchange with each other. Since  $d_{\pm 1}$  waves are actually two partial waves with equal contributions, when they dominate the process, the purity will be much smaller than the case where the  $d_0$  wave dominates.
